# Supplementary material for: Normative visual acuity in Chinese preschoolers aged 36 to <48 months as measured with the linear HOTV chart: the Yuhuatai Pediatric Eye Disease Study
Source: PubMed Central journal article supplement — BMJ Open. 2017 Jul 9;7(7):e014866. doi: 10.1136/bmjopen-2016-014866 (PMC5541621; doi:10.1136/bmjopen-2016-014866), 2017-07-09
Supplement: bmjopen-2016-014866.draft_revisions.pdf [file bmjopen-2016-014866.draft_revisions.pdf]

# BMJ Open

## Normative visual acuity in Chinese preschoolers aged 36 to < 48 months as measured with the linear HOTV chart

|                                 |                                                                                                                                                                                                                                                                                                                                                                                                                                                                                                                                                                                                                                                         |
|---------------------------------|---------------------------------------------------------------------------------------------------------------------------------------------------------------------------------------------------------------------------------------------------------------------------------------------------------------------------------------------------------------------------------------------------------------------------------------------------------------------------------------------------------------------------------------------------------------------------------------------------------------------------------------------------------|
| Journal:                        | <i>BMJ Open</i>                                                                                                                                                                                                                                                                                                                                                                                                                                                                                                                                                                                                                                         |
| Manuscript ID                   | bmjopen-2016-014866                                                                                                                                                                                                                                                                                                                                                                                                                                                                                                                                                                                                                                     |
| Article Type:                   | Research                                                                                                                                                                                                                                                                                                                                                                                                                                                                                                                                                                                                                                                |
| Date Submitted by the Author:   | 22-Oct-2016                                                                                                                                                                                                                                                                                                                                                                                                                                                                                                                                                                                                                                             |
| Complete List of Authors:       | Zhu, Hui<br>Huang, Dan; The First Affiliated Hospital with Nanjing Medical University, Ophthalmology<br>Sun, Qigang; The First Affiliated Hospital with Nanjing Medical University, Ophthalmology<br>Ding, Hui<br>Bai, Jing<br>Chen, Ji<br>Chen, Xuejuan; The First Affiliated Hospital with Nanjing Medical University, Ophthalmology<br>Wang, Yue; The First Affiliated Hospital with Nanjing Medical University, Ophthalmology<br>Zhang, Xiaohan; The First Affiliated Hospital with Nanjing Medical University, Ophthalmology<br>Wang, Jing<br>Li, Xinying<br>Liu, Hu; The First Affiliated Hospital with Nanjing Medical University, Ophthalmology |
| <b>Primary Subject Heading</b>: | Ophthalmology                                                                                                                                                                                                                                                                                                                                                                                                                                                                                                                                                                                                                                           |
| Secondary Subject Heading:      | Epidemiology, Paediatrics, Public health                                                                                                                                                                                                                                                                                                                                                                                                                                                                                                                                                                                                                |
| Keywords:                       | Paediatric ophthalmology < OPHTHALMOLOGY, PUBLIC HEALTH, PRIMARY CARE, Community child health < PAEDIATRICS                                                                                                                                                                                                                                                                                                                                                                                                                                                                                                                                             |
|                                 |                                                                                                                                                                                                                                                                                                                                                                                                                                                                                                                                                                                                                                                         |

SCHOLARONE™  
Manuscripts

1  
2  
3  
4  
5  
6  
7  
8  
9  
10  
11  
12  
13  
14  
15  
16  
17  
18  
19  
20  
21  
22  
23  
24  
25  
26  
27  
28  
29  
30  
31  
32  
33  
34  
35  
36  
37  
38  
39  
40  
41  
42  
43  
44  
45  
46  
47  
48  
49  
50  
51  
52  
53  
54  
55  
56  
57  
58  
59  
60  
1 Title page2 Normative visual acuity in Chinese preschoolers aged 36 to < 48  
3 months as measured with the linear HOTV chart4  
5 Hui Zhu<sup>1†</sup>, Dan Huang<sup>1†</sup>, Qigang Sun<sup>1†</sup>, Hui Ding<sup>2</sup>, Jing Bai<sup>2</sup>, Ji Chen<sup>2</sup>, Xuejuan  
6 Chen<sup>1</sup>, Yue Wang<sup>1</sup>, Xiaohan Zhang<sup>1</sup>, Jing Wang<sup>3</sup>, Xinying Li<sup>3</sup>, Hu Liu<sup>1\*</sup>7  
8 †These authors contributed equally to the study.9 <sup>1</sup>Department of ophthalmology, The First Affiliated Hospital with Nanjing Medical  
10 University, Nanjing, China.11 <sup>2</sup>Maternal and Child Healthcare Hospital of Yuhuatai District, Nanjing, China.12 <sup>3</sup>Jinling vision care center for children and adolescents, Nanjing, China.13  
14 \*Correspondence to: Hu Liu, 300 Guangzhou Road, Department of Ophthalmology,  
15 The First Affiliated Hospital with Nanjing Medical University, Nanjing 210029,  
16 China. Email: dr\_liuhu66@163.com, Phone: +86 (25) 68136470, Fax: +86 (25) 18  
17 83275171.18  
19 Word count: 2780.

1  
2  
3  
4  
5  
6  
7  
8  
9  
10  
11  
12  
13  
14  
15  
16  
17  
18  
19  
20  
21  
22  
23  
24  
25  
26  
27  
28  
29  
30  
31  
32  
33  
34  
35  
36  
37  
38  
39  
40  
41  
42  
43  
44  
45  
46  
47  
48  
49  
50  
51  
52  
53  
54  
55  
56  
57  
58  
59  
60

20 **Synopsis**

21       The 5th percentile of the normative uncorrected visual acuity distribution in  
22 Chinese children aged 36 to < 48 months were 20/40, which could be used as a  
23 referral cutoff to detect amblyopia cases.

For peer review only

24 **ABSTRACT**

25 **Objectives** To document population-based normative data for uncorrected visual  
26 acuity (UCVA) in Chinese preschoolers aged 36 to < 48 months without any  
27 sight-affecting abnormalities and to evaluate its effectiveness for vision referral.

28 **Methods** In a population-based cohort of children in the Yuhuatai Pediatric Eye  
29 Disease Study (YPEDS), UCVA was measured by using the linear HOTV chart,  
30 followed by other ocular examinations. Reference population was defined as children  
31 without ophthalmic abnormalities or refractive error. Normative UCVA was obtained  
32 from the reference population. The UCVA referral cutoff was defined as the lowest  
33 5th percentile of the normative distribution of UCVA.

34 **Results** The analysis cohort consisted of 1606 Chinese preschoolers aged 36 to < 48  
35 months. Among them, a total of 791 children were included in the reference  
36 population. The 5th, 50th, and 95th percentiles of the UCVA distribution in the  
37 reference population were 20/40, 20/32, and 20/25, respectively. UCVA improved  
38 with increasing age ( $p < 0.0001$ ), but worsen if prematurity was presented ( $p = 0.041$ ).  
39 Using the 5th percentile UCVA cutoff from the reference population generated referral  
40 rates of 26.9% in the general population, and detected more than 86% of amblyopia  
41 cases.

42 **Conclusions** We propose that UCVA no better than 20/40 measured by linear HOTV  
43 chart should be a referral cutoff for Chinese preschoolers aged 36 to < 48 months.  
44 Most amblyopia cases can be identified with this age-specific and chart-specific  
45 UCVA cutoff.

1  
2  
3  
4  
5  
6  
7  
8  
9  
10  
11  
12  
13  
14  
15  
16  
17  
18  
19  
20  
21  
22  
23  
24  
25  
26  
27  
28  
29  
30  
31  
32  
33  
34  
35  
36  
37  
38  
39  
40  
41  
42  
43  
44  
45  
46 **Strengths and limitations of this study**

- 47 • This is a population-based study, comprising 1606 preschoolers aged 36 to < 48  
48 months.
- 49 • Normative uncorrected visual acuity was obtained from 791 children without any  
50 sight-affecting abnormalities among the population-based cohort.
- 51 • The linear HOTV chart, which was recommended when measuring visual acuity  
52 in 3- and 4-year-old children, was used in the study.
- 53 • Only children with suspected abnormalities underwent cycloplegic refraction,  
54 which may impact the detection of sight-affecting refractive errors.
- 55 • 11.1% children were not testable when doing the HOTV test and were excluded  
56 from the analysis.
- 57

## 58 INTRODUCTION

59 Accurate and timely determination of visual acuity (VA) is the basis of clinical  
60 management of many ocular conditions in children.<sup>1</sup> The American Academy of  
61 Pediatrics (AAP) recommended that objective evaluation of VA be initiated by 3 years  
62 of age.<sup>2</sup> Unfortunately, because of the different charts used in different countries and  
63 the developing visual and cognitive systems, normative VA levels in children of  
64 preschool age are not uniform internationally.<sup>3-5</sup> This makes it difficult to accurately  
65 set referral criteria for vision screening and to effectively monitor and manage eye  
66 conditions, requiring the development of age-specific and chart-specific normative  
67 VA.

68 For ensuring measures accurately reflect what could be expected in healthy eyes,  
69 VA norms need to be established on the basis of normative data, obtained by studying  
70 reference populations of children who do not have sight-affecting ocular conditions.  
71 Normative data of this kind have been reported in the Multi-Ethnic Pediatric Eye  
72 Disease Study (MEPEDS),<sup>6</sup> and the Sydney Pediatric Eye Disease Study (SPEDS).<sup>7</sup>  
73 The samples of preschool children were African American and Hispanic in MEPEDS,  
74 and predominantly European Caucasian in SPEDS. Given that ethnicity and  
75 socio-economic status have potential effects on the level of VA measured,  
76 population-specific norms still need to be established for Chinese preschoolers.<sup>6, 8-9</sup>

77 In China, only the Shenzhen Kindergarten Eye Study (SKES) provided  
78 population-based normative data for VA in children 3 to 6 years old.<sup>10</sup> However, in  
79 SKES, VA was measured by the Early Treatment Diabetic Retinopathy Study  
80 (ETDRS) Tumbling E chart, which is commonly used in children aged 5<sup>1</sup>/<sub>2</sub> years  
81 and older but too difficult for younger children to complete.<sup>11</sup> The HOTV or Lea  
82 Symbols chart tests were recommended by AAP when measuring VA in 3- and  
83 4-year-old children.<sup>12</sup>

84 This report aims to provide the population-based normative distribution of  
85 monocular uncorrected VA (UCVA) and interocular differences (IOD) in UCVA in  
86 Chinese children aged 36 to < 48 months by using the linear HOTV chart, and explore

1  
2  
3  
4 87 appropriate UCVA criteria for referral of cases of suspected amblyopia and refractive  
5  
6 88 error. This analysis is part of the Yuhuatai Pediatric Eye Disease Study (YPEDS).  
7  
8  
9  
10  
11  
12  
13  
14  
15  
16  
17  
18  
19  
20  
21  
22  
23  
24  
25  
26  
27  
28  
29  
30  
31  
32  
33  
34  
35  
36  
37  
38  
39  
40  
41  
42  
43  
44  
45  
46  
47  
48  
49  
50  
51  
52  
53  
54  
55  
56  
57  
58  
59  
60

For peer review only

1  
2  
3  
4  
5  
6  
7  
8  
9  
10  
11  
12  
13  
14  
15  
16  
17  
18  
19  
20  
21  
22  
23  
24  
25  
26  
27  
28  
29  
30  
31  
32  
33  
34  
35  
36  
37  
38  
39  
40  
41  
42  
43  
44  
45  
46  
47  
48  
49  
50  
51  
52  
53  
54  
55  
56  
57  
58  
59  
60

89 **METHODS**

90 **Study population**

91 YPEDS is an ongoing prospective population-based vision screening study, with  
92 the specific aims of establishing a systematic database on refraction, visual acuity,  
93 ocular biometric parameters, ocular position and other ophthalmic measures,  
94 exploring the development rule of vision, and estimating the burden of common  
95 pediatric ocular disorders of preschool children.<sup>13</sup> All of the children, who resided in  
96 Yuhuatai District, were born between September 2011 and August 2012, and were  
97 about to enter a kindergarten in Yuhuatai District, were invited to participate in  
98 YPEDS and to undergo a further vision examination in addition to a compulsory  
99 health examination. The data presented in this paper were obtained from July 2015 to  
100 August 2015, when these children were 36 to < 48 months old.

101 This study was approved by the Ethics Committee of Nanjing Medical University  
102 and followed the tenets of the Declaration of Helsinki. Written informed consent was  
103 obtained from the parents or legal representatives of all the participating children.

104 **Ocular examinations**

105 A detailed parental interview was conducted, including questions regarding  
106 parental education level, monthly family income, employment of parent, history of  
107 pregnancy and delivery, parental history of smoking and drinking during pregnancy,  
108 and so on. Comprehensive eye examinations included distance VA, ocular alignment  
109 and motility, non-cycloplegic refractive error measurement, anterior segment  
110 examination, fundus evaluation and ocular biometric parameters.

111 Monocular distance UCVA measurements were attempted, first in the right eye,  
112 and then in the left, at 3 m by using a linear HOTV logMAR chart (GOOD-LITE,  
113 USA). A similar, standardized approach to the Amblyopia Treatment Study (ATS)  
114 HOTV VA testing protocol was adapted.<sup>14</sup> An initial screening phase determined an  
115 approximate threshold acuity, and then was followed by a first threshold  
116 determination phase, a reinforcement phase, and a second threshold determination  
117 phase. The best VA obtained from each of the two threshold phases was recorded as



1  
2  
3 118 the final VA. VA scores were measured in 0.1 logMAR increments from 20/125 to  
4  
5 119 20/8.  
6

7 120 Non-cycloplegic refraction was performed with the table-mounted autorefractor  
8  
9 121 (R-F10, Cannon, Tokyo, Japan), photorefractor (PlusoptiX GmbH, Nuremberg,  
10  
11 122 Germany) and retinoscopy. Cycloplegic refraction was performed in any of the  
12  
13 123 following conditions: (1) spherical equivalent refraction (SER) obtained from any of  
14  
15 124 the non-cycloplegic refraction measurements was  $\leq -0.50$  D in either eye,  $\geq +1.25$  D  
16  
17 125 in either eye, or showed a difference  $\geq 0.75$  D interocularly; (2) cylindrical diopter  
18  
19 126 obtained from any of the non-cycloplegic refraction measurements was  $\geq 0.75$  D in  
20  
21 127 either eye; (3) UCVA was  $< 20/40$  (logMAR 0.3) in either eye, or  $\geq 2$ -line IOD; (3)  
22  
23 128 abnormal results in the examinations of ocular alignment and motility, anterior  
24  
25 129 segment examination or fundus evaluation were found. Two drops of 1.0%  
26  
27 130 cyclopentolate (Cyclogyl, Alcon, Belgium) were instilled five minutes apart, with a  
28  
29 131 third drop administered 20 minutes later. Cycloplegia was then evaluated after an  
30  
31 132 additional 15 minutes. Cycloplegia was considered complete if a pupillary light reflex  
32  
33 133 was absent. If a light reflex was still detected, another drop of cyclopentolate was  
34  
35 134 administered, and the light reflex was evaluated again after 15 minutes. Cycloplegic  
36  
37 135 refraction was performed with the table-mounted autorefractor (R-F10, Cannon,  
38  
39 136 Tokyo, Japan). Subjective refraction was then assessed monocularly according to the  
40  
41 137 cycloplegic refraction values. The best-corrected VA (BCVA) was recorded based on  
42  
43 138 monocular subjective refraction, using the same protocol and VA chart as the UCVA  
44  
45 139 measurements.

#### 46 140 **Definitions**

47 141 The criteria of refractive errors were based on the cycloplegic refraction values:  
48  
49 142 myopia was defined as SER  $\leq -0.50$  D in either eye; hyperopia was defined as SER  $\geq$   
50  
51 143  $+2.00$  D in either eye; astigmatism was defined as a cylindrical refractive error  $\geq 0.75$   
52  
53 144 D; anisometropia was defined as an SER difference  $\geq 2.00$  D interocularly.

54 145 To be comparable with SKES, two definitions of amblyopia were also adopted in  
55  
56 146 the present report (Table 1): (1) the American Academy of Ophthalmology (AAO)

1  
2  
3 147 amblyopia Preferred Practice Pattern (PPP),<sup>15</sup> (2) the Chinese Ophthalmology Society  
4  
5 148 (COS) guidelines.<sup>16</sup>  
6  
7 149

8  
9 **Table 1. The two definitions of amblyopia in preschoolers aged 36 to < 48 months\***

| AAO Definition         |                               | COS Definition                                     |
|------------------------|-------------------------------|----------------------------------------------------|
| Unilateral amblyopia   | Bilateral amblyopia           | Amblyopia                                          |
| BCVA $\geq$ 2-line IOD | BCVA < 20/50 in<br>either eye | BCVA $\geq$ 2-line IOD or < 20/40 in<br>either eye |

10  
11  
12  
13  
14  
15  
16  
17  
18  
19 \*Amblyopia risk factors should be identified when diagnosing amblyopia.

20  
21 150

22 151 **Inclusion and exclusion criteria**

23  
24 152 Only Chinese children aged 36 to < 48 months able to complete monocular  
25  
26 153 UCVA testing in both eyes were included in the analysis and considered as the general  
27  
28 154 study population. The reference population was defined as the children without  
29  
30 155 sight-affecting ocular conditions, including myopia, hyperopia, astigmatism,  
31  
32 156 anisometropia, amblyopia, strabismus, nystagmus, visual axis occlusion, or other  
33  
34 157 anterior segment or fundus abnormalities capable of causing visual impairment.

35  
36 158 **Statistical analysis**

37  
38 159 UCVA outcomes were recorded continuously as mean logMAR UCVA or mean  
39  
40 160 logMAR IOD in UCVA and dichotomously as the proportion of children achieving a  
41  
42 161 particular level of UCVA or IOD. The UCVA for right and left eyes in the reference  
43  
44 162 population were highly correlated (Pearson's correlation = 0.721,  $p < 0.01$ ), thus right  
45  
46 163 eye UCVA was used to report the distribution of UCVA. The UCVA cutoff for referral  
47  
48 164 was defined as the lowest 5th percentile of the normative distribution of UCVA.  
49  
50 165 Effectiveness in referral for amblyopia or refractive error using the estimated UCVA  
51  
52 166 cutoff was than calculated. Multiple linear regression was used to assess associations  
53  
54 167 of logMAR UCVA with age, gender, and other potential risk factors. All analyses  
55  
56 168 were performed by using SPSS 22.0 (IBM, China) and a 0.05 significance level.

1  
2  
3  
4  
5  
6  
7  
8  
9  
10  
11  
12  
13  
14  
15  
16  
17  
18  
19  
20  
21  
22  
23  
24  
25  
26  
27  
28  
29  
30  
31  
32  
33  
34  
35  
36  
37  
38  
39  
40  
41  
42  
43  
44  
45  
46  
47  
48  
49  
50  
51  
52  
53  
54  
55  
56  
57  
58  
59  
60

169 **RESULTS**

170 **Study population**

171 A total of 2,300 preschoolers were enrolled in this study, and 1,806 participated in  
172 the UCVA test (78.5% responses rate), among which 1,606 (88.9%) were testable in  
173 both eyes and considered as the general population. According to the definition  
174 outlined in the methods, 791 (49.3%) children were classified as the reference  
175 population. Table 2 shows the demographic characteristics of the reference and  
176 general population. Boys constituted 53.5% of the reference population and 52.5% of  
177 the general population. There was no statistically significant sex difference in the  
178 mean age of the reference population ( $P = 0.277$ ) and the general population ( $P =$   
179  $0.607$ ).

180

**Table 2. Demographic and UCVA distribution of the reference and general population**

|                                                | The reference population<br>(n=791) | The general<br>population (N=1606) |
|------------------------------------------------|-------------------------------------|------------------------------------|
| <b>Gender, n</b>                               |                                     |                                    |
| Male                                           | 423                                 | 843                                |
| Female                                         | 368                                 | 763                                |
| <b>Age in months, mean <math>\pm</math> SD</b> |                                     |                                    |
| All                                            | 41.1 $\pm$ 3.4                      | 41.0 $\pm$ 3.4                     |
| Male                                           | 41.2 $\pm$ 3.4                      | 41.0 $\pm$ 3.4                     |
| Female                                         | 41.0 $\pm$ 3.3                      | 40.9 $\pm$ 3.3                     |

181

182 **UCVA outcomes**

183 Table 3 presents the distributions of UCVA in the reference population. About 60%  
184 of the measured monocular UCVA's fell in the category of 20/32. The 5th, 50th, and  
185 95th percentiles fell in the UCVA categories of 20/40, 20/32, and 20/25, respectively.

186

**Table 3. Distribution of UCVA and IOD in the reference population**

|                                        | n (%)       |
|----------------------------------------|-------------|
| <b>LogMAR UCVA (Snellen equiv.)</b>    |             |
| 0.6 (20/80)                            | 1 (0.1)     |
| 0.5 (20/63)                            | 2 (0.3)     |
| 0.4 (20/50)                            | 6 (0.8)     |
| 0.3 (20/40)                            | 106 (13.4)* |
| 0.2 (20/32)                            | 478 (60.4)* |
| 0.1 (20/25)                            | 170 (21.5)* |
| 0 (20/20)                              | 27 (3.4)    |
| -0.1 (20/16)                           | 1 (0.1)     |
| <b>UCVA IOD, lines (LogMAR equiv.)</b> |             |
| 0 (0.0)                                | 595 (75.2)  |
| 1 (0.1)                                | 181 (22.9)  |
| 2 (0.2)                                | 14 (1.8)    |
| 3 (0.3)                                | 1 (0.1)     |

\*The 5th, 50th, and 95th percentiles fell in the UCVA categories of 20/40, 20/32, and 20/25, respectively.

187

188 Age-specific and gender-specific mean logMAR UCVA levels for the right eye in  
 189 the reference population are shown in Table 4. A multivariate linear regression model  
 190 including age and gender showed that UCVA improved with increasing age ( $p <$   
 191  $0.0001$ ), but had no association with gender ( $p = 0.892$ ). Risk factors adjusted for age  
 192 and adjusted for age and gender for UCVA in the reference population are shown in  
 193 Table 5. Only prematurity was significantly associated with poorer UCVA after  
 194 adjustment for age ( $p = 0.040$ ), or adjusted for age and gender ( $p = 0.041$ ).

195

**Table 4. Mean logMAR UCVA and IOD in reference generation, by age and by gender**

| n | Mean UCVA (SD) | Mean absolute UCVA IOD (SD) |
|---|----------------|-----------------------------|
|---|----------------|-----------------------------|

|                      |     |             |             |
|----------------------|-----|-------------|-------------|
| <b>All</b>           | 791 | 0.19 (0.07) | 0.03 (0.05) |
| <b>Age in months</b> |     |             |             |
| 36 to <42            | 438 | 0.19 (0.08) | 0.03 (0.05) |
| 42 to <48            | 353 | 0.18 (0.07) | 0.02 (0.04) |
| <b>Gender</b>        |     |             |             |
| Male                 | 423 | 0.19 (0.08) | 0.03 (0.05) |
| Female               | 368 | 0.19 (0.07) | 0.02 (0.05) |

**Table 5. Risk factors adjusted for age and adjusted for age and gender for UCVA in the reference population**

| Associated factors                                  | Adjusted for age | Adjusted for age and gender |       |              |
|-----------------------------------------------------|------------------|-----------------------------|-------|--------------|
|                                                     | p value          | $\beta$ coefficient         | $r^2$ | p value      |
| Prematurity <37 weeks                               | <b>0.040</b>     | 0.082                       | 0.032 | <b>0.041</b> |
| Low birth weight <2500 g                            | 0.163            | 0.054                       | 0.028 | 0.163        |
| Maternal smoking during pregnancy                   | 0.770            | 0.012                       | 0.023 | 0.758        |
| Maternal drinking during pregnancy                  | 0.264            | -0.042                      | 0.024 | 0.270        |
| Parental tertiary education (University or College) | 0.755            | -0.012                      | 0.024 | 0.754        |
| Monthly family income                               | 0.685            | -0.019                      | 0.016 | 0.689        |
| Employment of one parent                            | 0.501            | -0.028                      | 0.030 | 0.506        |
| Employment of both parents                          | 0.791            | 0.011                       | 0.029 | 0.798        |

196

197

198 75.2% children in the reference population achieved equal vision in both eyes and  
 199 only 1.9% had an IOD of two or more lines ( $\geq 0.2$  logMAR) (Table 3). Table 4 shows  
 200 mean absolute logMAR UCVA IOD in the reference population, by age and by gender.  
 201 A multivariate linear regression model including age and gender showed that absolute  
 202 UCVA IOD decreased with increasing age ( $p = 0.014$ ), but had no association with  
 203 gender ( $p = 0.227$ ).

204 The mean non-absolute logMAR UCVA IOD (right eye minus left eye logMAR  
 205 VA) in the reference population was 0.0023, with no significantly difference from  
 206 zero ( $p = 0.251$ ), indicating no influence of the order in which the eyes were tested on  
 207 UCVA.

### 208 Effectiveness of the UCVA and UCVA IOD referral cutoffs

209 Using the 5th percentile UCVA cutoff from the reference population (defined as  
 210  $UCVA \leq 20/40$ ) would generate referral rates of 26.9% (432 cases) in the general  
 211 population. Table 6 shows the effectiveness in terms of sensitivity, specificity, positive  
 212 predictive value (PPV) and negative predictive value (NPV) in referral for refractive  
 213 errors or amblyopia using the current UCVA cutoff. A total of 39.5% (301/762) of  
 214 cases with any refractive error were detected, with a specificity of 84.5%. For  
 215 amblyopia using the AAO definition, the sensitivity and specificity were 86.2%  
 216 (25/29) and 74.2% (1170/1577), respectively, which are similar to the findings when  
 217 using the COS amblyopia definition (86.7% and 74.2%).

218

**Table 6. Effectiveness in Referral for Refractive Errors or Amblyopia Using the lowest 5th Percentile UCVA**

#### Cutoff Criteria

|                          | Sensitivity, n/N (%) | Specificity, n/N (%) | PPV, n/N (%)   | NPV, n/N (%)     |
|--------------------------|----------------------|----------------------|----------------|------------------|
| <b>Refractive Errors</b> |                      |                      |                |                  |
| Myopia                   | 112/319 (35.1)       | 967/1287 (75.1)      | 112/432 (25.9) | 967/1174 (82.4)  |
| Hyperopia                | 43/84 (51.2)         | 1133/1522 (74.4)     | 43/432 (10.0)  | 1133/1174 (96.5) |
| Astigmatism              | 252/518 (48.6)       | 908/1088 (83.5)      | 252/432 (58.3) | 908/1174 (77.3)  |
| Anisometropia            | 26/59 (44.1)         | 1141/1547 (73.8)     | 26/432 (6.0)   | 1141/1174 (97.2) |
| <b>Amblyopia</b>         |                      |                      |                |                  |
| AAO Definition           |                      |                      |                |                  |
| Unilateral Amblyopia     | 11/14 (78.6)         | 1171/1601 (73.1)     | 11/432 (2.5)   | 1171/1174 (99.7) |
| Bilateral Amblyopia      | 14/15 (93.3)         | 1173/1591 (73.7)     | 14/432 (3.2)   | 1173/1174 (99.9) |
| COS Definition           | 26/30 (86.7)         | 1170/1576 (74.2)     | 26/432 (6.0)   | 1170/1174 (99.7) |

219

1  
2  
3  
4 220 When using the UCVA IOD of two or more lines as the criterion, only 4.3% (69  
5 221 cases) of the general population would be referred. According to the AAO definition,  
6  
7 222 this criterion detected 20.7% (6/29) of cases with any amblyopia, and 28.6% (4/14) of  
8  
9 223 cases with unilateral amblyopia. For amblyopia using the COS definition, 26.7%  
10  
11 224 (8/30) of cases with amblyopia were detected using such criterion.  
12  
13  
14  
15  
16  
17  
18  
19  
20  
21  
22  
23  
24  
25  
26  
27  
28  
29  
30  
31  
32  
33  
34  
35  
36  
37  
38  
39  
40  
41  
42  
43  
44  
45  
46  
47  
48  
49  
50  
51  
52  
53  
54  
55  
56  
57  
58  
59  
60

For peer review only

1  
2  
3 225 **DISCUSSION**  
4

5 226 In China, SKES was the only population-based investigation of UCVA normative  
6  
7 227 distribution in Chinese preschoolers before our study.<sup>10</sup> In order to be comparable  
8  
9 228 with SKES and also to ensure that children with sight-affecting ocular conditions  
10  
11 229 were excluded, we used the same stringent definition of the “reference population” as  
12  
13 230 SKES. However, the lowest 5th percentile in our reference population, falling in the  
14  
15 231 UCVA category of 20/40, was two lines better than this found in the 3-year-old  
16  
17 232 reference population in SKES (20/63). In addition, the 50th percentile in our reference  
18  
19 233 population was one line better than this in SKES (20/32 vs. 20/40). Two reasons  
20  
21 234 might contribute to the differences between our study and SKES. First, we measured  
22  
23 235 the UCVA using the HOTV chart, which is recommended and commonly used in  
24  
25 236 Western countries for young children,<sup>6-7, 12</sup> while SKES used the ETDRS Tumbling E  
26  
27 237 chart which is harder for young children.<sup>17-19</sup> Second, smaller sample size of the  
28  
29 238 3-year-old children (51 cases) in the reference population of SKES might have a  
30  
31 239 significant influence on the results of UCVA normative distribution.

32 240 We are unable to compare the mean logMAR UCVA in our study with that in  
33  
34 241 SKES as SKES didn't calculate this. When our mean logMAR UCVA is compared to  
35  
36 242 this obtained from the African American and Hispanic children without sight-affecting  
37  
38 243 abnormalities in MEPEDS, the mean logMAR UCVA in our reference population is  
39  
40 244 very close to this established in the MEPEDS 36- to 47-month-old children using the  
41  
42 245 ATS HOTV (0.19 vs. 0.17 logMAR).<sup>6</sup> If compared to the results obtained from the  
43  
44 246 European Caucasian and Asian children without sight-affecting abnormalities in  
45  
46 247 SPEDS, the mean logMAR UCVA in our reference population is close to one line  
47  
48 248 worse than this tested with the ATS HOTV in SPEDS (0.19 vs. 0.09 logMAR for  
49  
50 249 children aged 36 to <42 months; 0.18 vs. 0.07 for 42 to <48 months), and similar to  
51  
52 250 this tested with the linear ETDRS or HOTV logMAR chart (0.19 vs. 0.22 logMAR for  
53  
54 251 children aged 36 to <42 months; 0.18 vs. 0.16 for 42 to <48 months).<sup>7</sup> However, the  
55  
56 252 significances of such comparisons are not very clear, because that the ATS HOTV VA  
57  
58 253 test is quite different from the linear HOTV logMAR chart that we used, and SPEDS



1  
2  
3 254 didn't specify the mean logMAR UCVA when only using linear HOTV logMAR  
4  
5 255 chart.

6  
7 256 We found improvement in UCVA with increasing age, as has been reported in  
8  
9 257 several studies despite different charts used.<sup>6-7, 10, 18, 20</sup> Gender was not associated with  
10  
11 258 UCVA both in our sample and SPEDS, opposite to that reported in MEPEDS.<sup>6-7</sup> As  
12  
13 259 for risk factors of UCVA, prematurity was related with worse UCVA in our reference  
14  
15 260 population, which was consistent with the finding in SPEDS. However, socio  
16  
17 261 economic status (SES) factors, such as the employment status of parents and family  
18  
19 262 income, which were significantly associated with UCVA in MEPEDS and SPEDS,  
20  
21 263 showed no associations with UCVA in our study. In addition, maternal smoking  
22  
23 264 during pregnancy, which was related with slightly better UCVA in SPEDS, had no  
24  
25 265 relationship with UCVA in our study.

26  
27 266 As the penalty for missing one amblyopia case is a lifetime disability and  
28  
29 267 treatment exists, the UCVA referral cutoff for amblyopia should target high sensitivity,  
30  
31 268 while the specificity should be high enough not to put immense load on  
32  
33 269 ophthalmologists.<sup>21-22</sup> The sensitivity of detecting amblyopia by using the UCVA  
34  
35 270 referral cutoff in our study ( $UCVA \leq 20/40$  at age 36 to < 48 months), was as high as  
36  
37 271 86%, and at the same time, the specificity was high enough (74.2%). On the other  
38  
39 272 hand, this cutoff only identified a total of 39.5% refractive errors, even though the  
40  
41 273 overall specificity was high (84.5%). The sensitivity in detecting myopia was not  
42  
43 274 good in our study (35.1%), lower than hyperopia (51.2), astigmatism (48.6%), and  
44  
45 275 anisometropia (44.1%). In SKES, even though a high sensitivity (83.3%) in detecting  
46  
47 276 myopia was observed in all 3- to 6-year-old preschoolers, it's not available to  
48  
49 277 calculate the sensitivity in detecting myopia in 3-year-old children because of no  
50  
51 278 presence of myopia in this age group. And for all refractive errors in 3-year-old  
52  
53 279 children in SKES, the overall sensitivity was only 8.6%. Therefore, only using the  
54  
55 280 UCVA cutoff as referral criterion might be difficult to detect refractive errors in  
56  
57 281 3-year-old children, and additional refraction examination might be necessary for  
58  
59 282 vision screening.

1  
2  
3 283 The normative distribution of UCVA IOD in our study was consistent with that in  
4  
5 284 SKES, with most children achieving equal vision in both eyes. No effect of gender or  
6  
7 285 testing order on IOD was observed in our study, which was consistent with MEPED.  
8  
9 286 However, we found that absolute UCVA IOD decreased with increasing age of month  
10  
11 287 in our sample, which was not consistent with the findings in 30- to 72-month-old  
12  
13 288 children in MEPED. The reason of this difference might be that, in MEPED, equal  
14  
15 289 vision in both eyes in older children hid the effect of age on UCVA IOD in younger  
16  
17 290 children.

18  
19 291 When using UCVA IOD of two or more lines as the criterion, approximately 4%  
20  
21 292 in the general population would be referred in both of SKES and our study. The  
22  
23 293 sensitivity of using this criterion alone for detecting amblyopia, including unilateral  
24  
25 294 amblyopia, was very low in our study, similar to the results in SKES.

26  
27 295 To our knowledge, the present study is the first to provide population-based  
28  
29 296 HOTV-specific normative UCVA data in Chinese preschoolers aged 36 to < 48  
30  
31 297 months without significant refractive error or other ophthalmic abnormalities.  
32  
33 298 However, there are several limitations in the present study. Because that young  
34  
35 299 children are very afraid of using eye drops, which makes cycloplegia difficult and  
36  
37 300 unacceptable for parents, only children with suspected abnormalities underwent  
38  
39 301 cycloplegic refraction in our study. Even though not all children had refraction results  
40  
41 302 under cycloplegia, we adopted stringent criteria to identify children who needed  
42  
43 303 cycloplegic refraction, which could effectively detect sight-affecting refractive errors.  
44  
45 304 11.1% children were not testable when doing the HOTV test and were excluded from  
46  
47 305 the analysis, which may influence the normative UCVA distribution. However, the  
48  
49 306 testability in our study was at an average level of published reports,<sup>6, 10</sup> and difficulty  
50  
51 307 to increase further in young children.

52  
53 308 In conclusion, our study suggests that Chinese preschoolers aged 36 to < 48  
54  
55 309 months with UCVA no better than 20/40 measured by linear HOTV chart should be  
56  
57 310 referred for further ophthalmic examinations. Most amblyopia cases can be identified  
58  
59 311 with this age-specific and chart-specific UCVA cutoff.  
60

1  
2  
3  
4 312 **Acknowledgements** We thank the children, the corresponding parents or legal  
5  
6 313 guardians and all the members of the Maternal and Child Healthcare Hospital of  
7  
8 314 Yuhuatai District, Nanjing, China, for helpful advice and support.

9 315 **Contributors** Conceived and designed the experiments: HL, HZ, DH and QS.  
10  
11 316 Performed the experiments: HZ, DH, QS, HD, JB, JC, YW, XZ, JW and XL.  
12  
13 317 Analyzed the data: HZ, DH, QS and XC. Contributed reagents/materials/analysis  
14  
15 318 tools: HL, HZ, DH, HD, JB, JC, and XC. Wrote the paper: HL, HZ, DH, QS, XC, HD,  
16  
17 319 JB, JC, YW, XZ, JW and XL.

18  
19 320 **Funding** This study is supported by Scientific Research Projects of Jiangsu Provincial  
20  
21 321 Commission of Health and Family Planning (Grant No. H201507); Natural Science  
22  
23 322 Foundation of Jiangsu Province (Grant No. BK20141027 and No. BK20161595);  
24  
25 323 National Natural Science Foundation of China (Grant No. 81400435 and No.  
26  
27 324 81673198).

28 325 **Competing interests** None declared.

29  
30 326 **Patient consent** Obtained.

31  
32 327 **Ethics approval** The Institutional Review Board of Jiangsu Province Hospital.

33  
34 328 **Provenance and peer review** Not commissioned; externally peer reviewed.

35  
36 329 **Data sharing statement** No additional data are available.  
37  
38  
39  
40  
41  
42  
43  
44  
45  
46  
47  
48  
49  
50  
51  
52  
53  
54  
55  
56  
57  
58  
59  
60

330 **REFERENCE**

- 331 1 Hartmann EE, Dobson V, Hainline L, et al. Preschool vision screening: summary  
332 of a Task Force report. Behalf of the Maternal and Child Health Bureau and the  
333 National Eye Institute Task Force on Vision Screening in the Preschool Child.  
334 *Pediatrics* 2000;106:1105-16.
- 335 2 American Academy of Pediatrics, Committee on Practice and Ambulatory  
336 Medicine and Section on Ophthalmology. Eye examination in infants, children,  
337 and young adults by pediatricians. *Pediatrics* 2003;111:902-7.
- 338 3 Lai YH, Hsu HT, Wang HZ, et al. The visual status of children ages 3 to 6 years  
339 in the vision screening program in Taiwan. *J AAPOS* 2009;13:58-62.
- 340 4 Hard AL, Sjodell L, Borres MP, et al. Preschool vision screening in a Swedish  
341 city region: results after alteration of criteria for referral to eye clinics. *Acta*  
342 *Ophthalmol Scand* 2002;80:608-11.
- 343 5 Donahue SP, Arthur B, Neely DE, et al. Guidelines for automated preschool  
344 vision screening: a 10-year, evidence-based update. *J AAPOS* 2013;17:4-8.
- 345 6 Pan Y, Tarczy-Hornoch KT, Cotter SA, et al. Visual acuity norms in pre-school  
346 children: the Multi-Ethnic Pediatric Eye Disease Study. *Optom Vis Sci*  
347 2009;86:607-12.
- 348 7 Leone JF, Mitchell P, Kifley A, et al. Normative visual acuity in infants and  
349 preschool-aged children in Sydney. *Acta Ophthalmol* 2014;92:e521-e529.
- 350 8 Friedman DS, Repka MX, Katz J, et al. Prevalence of decreased visual acuity  
351 among preschool-aged children in an American urban population: the Baltimore  
352 Pediatric Eye Disease Study, methods, and results. *Ophthalmology*  
353 2008;115:1786-95.
- 354 9 Robaei D, Rose K, Ojaimi E, et al. Visual acuity and the causes of visual loss in a  
355 population-based sample of 6-year-old Australian children. *Ophthalmology*  
356 2005;112:1275-82.
- 357 10 Guo X, Fu M, Lu J, et al. Normative distribution of visual acuity in 3- to  
358 6-year-old Chinese preschoolers: the Shenzhen Kindergarten Eye Study. *Invest*

- 1  
2  
3 359 *Ophthalmol Vis Sci* 2015;56:1985-92.  
4  
5 360 11 Cryotherapy for Retinopathy of Prematurity Cooperative Group. Multicenter trial  
6  
7 361 of cryotherapy for retinopathy of prematurity: Snellen visual acuity and structural  
8  
9 362 outcome at 5 1/2 years after randomization. *Arch Ophthalmol* 1996;114:417-24.  
10  
11 363 12 Hartmann EE, Bradford GE, Chaplin PK, et al. Project Universal Preschool  
12  
13 364 Vision Screening: a demonstration project. *Pediatrics* 2006;117(2):e226-37.  
14  
15 365 13 Huang D, Chen X, Gong Q, et al. Ocular biometric parameters among 3-year-old  
16  
17 366 Chinese children: testability, distribution and association with anthropometric  
18  
19 367 parameters. *Sci Rep* 2016 Jul 7;6:29577. doi: 10.1038/srep29577.  
20  
21 368 14 Holmes JM, Beck RW, Repka MX, et al. The amblyopia treatment study visual  
22  
23 369 acuity testing protocol. *Arch Ophthalmol* 2001;119:1345-53.  
24  
25 370 15 American Academy of Ophthalmology Pediatric Ophthalmology/Strabismus  
26  
27 371 Panel. Preferred practice pattern® Guidelines. Amblyopia. San Francisco, CA:  
28  
29 372 American Academy of Ophthalmology;2012. Available at: www.aao.org/ppp.  
30  
31 373 16 Chinese Ophthalmology Society. Guidelines for amblyopia diagnosis. *Chin J*  
32  
33 374 *Ophthalmol* 2011;47:768.  
34  
35 375 17 He M, Zeng J, Liu Y, et al. Refractive error and visual impairment in urban  
36  
37 376 children in southern China. *Ophthalmology* 2004;45:795-9.  
38  
39 377 18 Drover JR, Feliuss J, Cheng CS, et al. Normative pediatric visual acuity using  
40  
41 378 single surrounded HOTV optotypes on the Electronic Visual Acuity Tester  
42  
43 379 following the Amblyopia Treatment Study protocol. *J AAPOS* 2008;12:145-9.  
44  
45 380 19 Rice ML, Leske DA, Holmes JM. Comparison of the amblyopia treatment study  
46  
47 381 HOTV and electronic-early treatment of diabetic retinopathy study visual acuity  
48  
49 382 protocols in children aged 5 to 12 years. *Am J Ophthalmol* 2004;137:278-82.  
50  
51 383 20 Dobson V, Clifford D, Candice E, et al. Normative monocular visual acuity for  
52  
53 384 early treatment diabetic retinopathy study charts in emmetropic children 5 to 12  
54  
55 385 years of age. *Ophthalmology* 2009;116:1397-401.  
56  
57 386 21 Kvarnström G, Jakobsson P, Lennerstrand G. Screening for visual and ocular  
58  
59 387 disorders in children, evaluation of the system in Sweden. *Acta Paediatr*

1  
2  
3  
4  
5  
6  
7  
8  
9  
10  
11  
12  
13  
14  
15  
16  
17  
18  
19  
20  
21  
22  
23  
24  
25  
26  
27  
28  
29  
30  
31  
32  
33  
34  
35  
36  
37  
38  
39  
40  
41  
42  
43  
44  
45  
46  
47  
48  
49  
50  
51  
52  
53  
54  
55  
56  
57  
58  
59  
60

388 1998;87:1173-9.  
389 22 Mladen Bušić, Mirjana Bjeloš, Mladen Petrovečki, et al. Zagreb Amblyopia  
390 Preschool Screening Study: near and distance visual acuity testing increase the  
391 diagnostic accuracy of screening for amblyopia. *Croat Med J* 2016;57:29-41.

For peer review only

# BMJ Open

## Normative visual acuity in Chinese preschoolers aged 36 to < 48 months as measured with the linear HOTV chart: the Yuhuatai Pediatric Eye Disease Study

|                                 |                                                                                                                                                                                                                                                                                                                                                                                                                                                                                                                                                                                                                                                                                                                                                                                                                                                                                                                                                                  |
|---------------------------------|------------------------------------------------------------------------------------------------------------------------------------------------------------------------------------------------------------------------------------------------------------------------------------------------------------------------------------------------------------------------------------------------------------------------------------------------------------------------------------------------------------------------------------------------------------------------------------------------------------------------------------------------------------------------------------------------------------------------------------------------------------------------------------------------------------------------------------------------------------------------------------------------------------------------------------------------------------------|
| Journal:                        | <i>BMJ Open</i>                                                                                                                                                                                                                                                                                                                                                                                                                                                                                                                                                                                                                                                                                                                                                                                                                                                                                                                                                  |
| Manuscript ID                   | bmjopen-2016-014866.R1                                                                                                                                                                                                                                                                                                                                                                                                                                                                                                                                                                                                                                                                                                                                                                                                                                                                                                                                           |
| Article Type:                   | Research                                                                                                                                                                                                                                                                                                                                                                                                                                                                                                                                                                                                                                                                                                                                                                                                                                                                                                                                                         |
| Date Submitted by the Author:   | 15-Mar-2017                                                                                                                                                                                                                                                                                                                                                                                                                                                                                                                                                                                                                                                                                                                                                                                                                                                                                                                                                      |
| Complete List of Authors:       | Zhu, Hui<br>Huang, Dan; The First Affiliated Hospital with Nanjing Medical University, Ophthalmology<br>Sun, Qigang; The First Affiliated Hospital with Nanjing Medical University, Ophthalmology<br>Ding, Hui; Maternal and Child Healthcare Hospital of Yuhuatai District<br>Bai, Jing; Maternal and Child Healthcare Hospital of Yuhuatai District<br>Chen, Ji; Maternal and Child Healthcare Hospital of Yuhuatai District<br>Chen, Xuejuan; The First Affiliated Hospital with Nanjing Medical University, Ophthalmology<br>Wang, Yue; The First Affiliated Hospital with Nanjing Medical University, Ophthalmology<br>Zhang, Xiaohan; The First Affiliated Hospital with Nanjing Medical University, Ophthalmology<br>Wang, Jing; Jinling vision care center for children and adolescents<br>Li, Xinying; Jinling vision care center for children and adolescents<br>Liu, Hu; The First Affiliated Hospital with Nanjing Medical University, Ophthalmology |
| <b>Primary Subject Heading</b>: | Ophthalmology                                                                                                                                                                                                                                                                                                                                                                                                                                                                                                                                                                                                                                                                                                                                                                                                                                                                                                                                                    |
| Secondary Subject Heading:      | Epidemiology, Paediatrics, Public health                                                                                                                                                                                                                                                                                                                                                                                                                                                                                                                                                                                                                                                                                                                                                                                                                                                                                                                         |
| Keywords:                       | Paediatric ophthalmology < OPHTHALMOLOGY, PUBLIC HEALTH, PRIMARY CARE, Community child health < PAEDIATRICS                                                                                                                                                                                                                                                                                                                                                                                                                                                                                                                                                                                                                                                                                                                                                                                                                                                      |
|                                 |                                                                                                                                                                                                                                                                                                                                                                                                                                                                                                                                                                                                                                                                                                                                                                                                                                                                                                                                                                  |

SCHOLARONE™  
Manuscripts

1  
2  
3  
4  
5  
6  
7  
8  
9  
10  
11  
12  
13  
14  
15  
16  
17  
18  
19  
20  
21  
22  
23  
24  
25  
26  
27  
28  
29  
30  
31  
32  
33  
34  
35  
36  
37  
38  
39  
40  
41  
42  
43  
44  
45  
46  
47  
48  
49  
50  
51  
52  
53  
54  
55  
56  
57  
58  
59  
60  
1 Title page2 Normative visual acuity in Chinese preschoolers aged 36 to < 48  
3 months as measured with the linear HOTV chart: the Yuhuatai  
4 Pediatric Eye Disease Study5  
6 Hui Zhu<sup>1†</sup>, Dan Huang<sup>1†</sup>, Qigang Sun<sup>1†</sup>, Hui Ding<sup>2</sup>, Jing Bai<sup>2</sup>, Ji Chen<sup>2</sup>, Xuejuan  
7 Chen<sup>1</sup>, Yue Wang<sup>1</sup>, Xiaohan Zhang<sup>1</sup>, Jing Wang<sup>3</sup>, Xinying Li<sup>3</sup>, Hu Liu<sup>1\*</sup>8  
9 †These authors contributed equally to the study.10 <sup>1</sup>Department of ophthalmology, The First Affiliated Hospital with Nanjing Medical  
11 University, Nanjing, China.12 <sup>2</sup>Maternal and Child Healthcare Hospital of Yuhuatai District, Nanjing, China.13 <sup>3</sup>Jinling vision care center for children and adolescents, Nanjing, China.14  
15 \*Correspondence to: Hu Liu, 300 Guangzhou Road, Department of Ophthalmology,  
16 The First Affiliated Hospital with Nanjing Medical University, Nanjing 210029,  
17 China. Email: dr\_liuhu66@163.com, Phone: +86 (25) 68136470, Fax: +86 (25) 18  
18 83275171.19  
20 Word count: 3700.



21 **ABSTRACT**

22 **Objectives** To document population-based normative data for uncorrected visual  
23 acuity (UCVA) in Chinese preschoolers aged 36 to < 48 months without any  
24 sight-affecting abnormalities and to evaluate its effectiveness for vision referral.

25 **Methods** In a population-based cohort of children in the Yuhuatai Pediatric Eye  
26 Disease Study (YPEDS), UCVA was measured by using the linear HOTV chart,  
27 followed by other ocular examinations. Reference population was defined as children  
28 without ophthalmic abnormalities or refractive error. Normative UCVA was obtained  
29 from the reference population. The UCVA referral cutoff was defined as the lowest  
30 5th percentile of the normative distribution of UCVA.

31 **Results** The analysis cohort consisted of 1606 Chinese preschoolers aged 36 to < 48  
32 months. Among them, a total of 791 children were included in the reference  
33 population. The 5th, 50th, and 95th percentiles of the UCVA distribution in the  
34 reference population were 20/40, 20/32, and 20/25, respectively. UCVA improved  
35 with increasing age ( $p < 0.0001$ ), but worsen if prematurity was presented ( $p = 0.041$ ).  
36 Using the 5th percentile UCVA cutoff from the reference population generated referral  
37 rates of 26.9% in the general population, and detected more than 86% of amblyopia  
38 cases.

39 **Conclusions** We propose that UCVA no better than 20/40 measured by linear HOTV  
40 chart should be a referral cutoff for Chinese preschoolers aged 36 to < 48 months.  
41 Most amblyopia cases can be identified with this age-specific and chart-specific  
42 UCVA cutoff.

43

1  
2  
3  
4  
5  
6  
7  
8  
9  
10  
11  
12  
13  
14  
15  
16  
17  
18  
19  
20  
21  
22  
23  
24  
25  
26  
27  
28  
29  
30  
31  
32  
33  
34  
35  
36  
37  
38  
39  
40  
41  
42  
43  
44 **Strengths and limitations of this study**

- 45 • This is a population-based study, comprising 1606 preschoolers aged 36 to < 48  
46 months.  
47 • Normative uncorrected visual acuity was obtained from 791 children without any  
48 sight-affecting abnormalities among the population-based cohort.  
49 • The linear HOTV chart, which was recommended when measuring visual acuity  
50 in 36- and 48-month-old children, was used in the study.  
51 • Only children with suspected abnormalities underwent cycloplegic refraction,  
52 which may impact the detection of sight-affecting refractive errors.  
53 • 11.1% children were not testable when doing the HOTV test and were excluded  
54 from the analysis.  
55

## 56 INTRODUCTION

57 Accurate and timely determination of visual acuity (VA) is the basis of clinical  
58 management of many ocular conditions in children.<sup>1</sup> The American Academy of  
59 Pediatrics (AAP) recommended that objective evaluation of VA be initiated by 36  
60 months of age.<sup>2</sup> Unfortunately, because of the different charts used in different  
61 countries and the developing visual and cognitive systems, normative VA levels in  
62 children of preschool age are not uniform internationally.<sup>3-5</sup> This makes it difficult to  
63 accurately set referral criteria for vision screening and to effectively monitor and  
64 manage eye conditions, requiring the development of age-specific and chart-specific  
65 normative VA.

66 For ensuring measures accurately reflect what could be expected in healthy eyes,  
67 VA norms need to be established on the basis of normative data, obtained by studying  
68 reference populations of children who do not have sight-affecting ocular conditions.  
69 Normative data of this kind have been reported in the Multi-Ethnic Pediatric Eye  
70 Disease Study (MEPEDS),<sup>6</sup> and the Sydney Pediatric Eye Disease Study (SPEDS).<sup>7</sup>  
71 The samples of preschool children were African American and Hispanic in MEPEDS,  
72 and predominantly European Caucasian in SPEDS. Given that ethnicity and  
73 socio-economic status have potential effects on the level of VA measured,  
74 population-specific norms still need to be established for Chinese preschoolers.<sup>6-9</sup>

75 In China, only the Shenzhen Kindergarten Eye Study (SKES) provided  
76 population-based normative data for VA in children 36 to 72 months old.<sup>10</sup> However,  
77 in SKES, VA was measured by the Early Treatment Diabetic Retinopathy Study  
78 (ETDRS) Tumbling E chart, which is commonly used in children aged 66 months and  
79 older but too difficult for younger children to complete.<sup>11</sup> The HOTV or Lea Symbols  
80 chart tests were recommended by AAP when measuring VA in 36- and 48-month-old  
81 children.<sup>12</sup>

82 This report aims to provide the population-based normative distribution of  
83 monocular uncorrected VA (UCVA) and interocular differences (IOD) in UCVA in  
84 Chinese children aged 36 to < 48 months by using the linear HOTV chart, and explore

1  
2  
3  
4  
5  
6  
7  
8  
9  
10  
11  
12  
13  
14  
15  
16  
17  
18  
19  
20  
21  
22  
23  
24  
25  
26  
27  
28  
29  
30  
31  
32  
33  
34  
35  
36  
37  
38  
39  
40  
41  
42  
43  
44  
45  
46  
47  
48  
49  
50  
51  
52  
53  
54  
55  
56  
57  
58  
59  
60

85 appropriate UCVA criteria for referral of cases of suspected amblyopia and refractive  
86 error. This analysis is part of the Yuhuatai Pediatric Eye Disease Study (YPEDS).

For peer review only

1  
2  
3  
4  
5  
6  
7  
8  
9  
10  
11  
12  
13  
14  
15  
16  
17  
18  
19  
20  
21  
22  
23  
24  
25  
26  
27  
28  
29  
30  
31  
32  
33  
34  
35  
36  
37  
38  
39  
40  
41  
42  
43  
44  
45  
46  
47  
48  
49  
50  
51  
52  
53  
54  
55  
56  
57  
58  
59  
60

87 **METHODS**

88 **Study population**

89 YPEDS is an ongoing prospective population-based vision screening study, with  
90 the specific aims of establishing a systematic database on refraction, visual acuity,  
91 ocular biometric parameters, ocular position and other ophthalmic measures,  
92 exploring the development role of vision, and estimating the burden of common  
93 pediatric ocular disorders of preschool children.<sup>13</sup> All of the children, who resided in  
94 Yuhuatai District, were born between September 2011 and August 2012, and were  
95 about to enter a kindergarten in Yuhuatai District, were invited to participate in  
96 YPEDS and to undergo a further vision examination in addition to a compulsory  
97 health examination. The data presented in this paper were obtained from July 2015 to  
98 August 2015, when these children were 36 to < 48 months old.

99 This study was approved by the Ethics Committee of Nanjing Medical University  
100 and followed the tenets of the Declaration of Helsinki. Written informed consent was  
101 obtained from the parents or legal representatives of all the participating children.

102 **Ocular examinations**

103 A detailed parental interview was conducted, including questions regarding  
104 parental education level, monthly family income, employment of parent/s, history of  
105 pregnancy and delivery, and parental history of smoking and drinking during  
106 pregnancy. Comprehensive eye examinations included distance VA, ocular alignment  
107 and motility, non-cycloplegic refractive error measurement, anterior segment  
108 examination, fundus evaluation by indirect ophthalmoscopy and ocular biometric  
109 parameters.

110 Monocular distance UCVA measurements were attempted, first in the right eye,  
111 and then in the left, at 3 m by using a retroilluminated (ESV1200 Illuminated Cabinet,  
112 GOOD-LITE, USA) linear HOTV logMAR chart (600017, GOOD-LITE, USA) with  
113 matching letter card. VA scores were measured in 0.1 logMAR increments from  
114 20/100 to 20/16. A similar, standardized approach to the Amblyopia Treatment Study  
115 (ATS) HOTV VA testing protocol was adapted:<sup>14</sup>

1  
2  
3 116 **1) Screening**  
4

5 117 Patch the eye not being tested. Project a 20/100 optotype. If correct, go down a  
6  
7 118 logMAR level and again show a single optotype. Continue through 20/20 with  
8  
9 119 1 letter per level until an incorrect response.

10  
11 120 **2) Phase 1**  
12

13 121 Move up 2 letter sizes from the letter size with the incorrect response in  
14  
15 122 screening up to maximum size of 20/100.

16  
17 123 • Present 4 new letters (if first 3 new letters are correct, then the fourth does not  
18  
19 124 need to be tested; as soon as 2 letters are missed, testing of a level stops).

20  
21 125 • If less than 3 letters are correct, proceed to the next largest size and so on until  
22  
23 126 3 of 4 are correct. When 3 of 4 are correct, proceed to “reinforcement”. If  
24  
25 127 20/100 is failed, stop testing.

26  
27 128 • If 3 letters are correct, repeat on next smallest optotype. Continue to move to  
28  
29 129 smaller optotypes as long as first 3 or 3 of 4 are correct. If 20/16 is passed,  
30  
31 130 test is over. When 2 letters on a level are missed, stop and move to  
32  
33 131 “reinforcement”.

34 132 **3) Reinforcement**  
35

36 133 Move up 3 level from the level missed in phase 1 and show 3 successively  
37  
38 134 smaller single letters. If the patient fails phase 1 at 20/63 or 20/80, show three  
39  
40 135 20/100 letters but still start phase 2 at the level failed in phase 1. Whether or  
41  
42 136 not all 3 are correct in reinforcement, proceed to phase 2.

43 137 **4) Phase 2**  
44

45 138 Retest the last level failed in phase 1. Continue the test by the same procedure  
46  
47 139 as described for phase 1, with the exception that if 2 letters are missed, testing  
48  
49 140 stops.

50  
51 141 **5) Recording Visual Acuity**  
52

53 142 Acuity is the smallest letter size (level) passed in phase 1 or phase 2.

54  
55 143 Non-cycloplegic refraction was performed with the table-mounted autorefractor  
56  
57 144 (R-F10, Cannon, Tokyo, Japan), photorefractor (PlusoptiX GmbH, Nuremberg,

1  
2  
3  
4 145 Germany) and retinoscopy. Cycloplegic refraction was performed in any of the  
5  
6 146 following conditions: (1) spherical equivalent refraction (SER) obtained from any of  
7  
8 147 the non-cycloplegic refraction measurements was  $\leq -0.50$  D in either eye,  $\geq +1.25$  D  
9  
10 148 in either eye, or showed a difference  $\geq 0.75$  D interocularly; (2) cylindrical diopter  
11  
12 149 obtained from any of the non-cycloplegic refraction measurements was  $\geq 0.75$  D in  
13  
14 150 either eye; (3) UCVA was  $< 20/40$  (logMAR 0.3) in either eye, or  $\geq 2$ -line IOD; (4)  
15  
16 151 abnormal results in the examinations of ocular alignment and motility, anterior  
17  
18 152 segment examination or fundus evaluation were found. Two drops of 1.0%  
19  
20 153 cyclopentolate (Cyclogyl, Alcon, Belgium) were instilled five minutes apart, with a  
21  
22 154 third drop administered 20 minutes later. Cycloplegia was then evaluated after an  
23  
24 155 additional 15 minutes. Cycloplegia was considered complete if a pupillary light reflex  
25  
26 156 was absent. If a light reflex was still detected, another drop of cyclopentolate was  
27  
28 157 administered, and the light reflex was evaluated again after 15 minutes. Cycloplegic  
29  
30 158 refraction was performed with the table-mounted autorefractor (R-F10, Cannon,  
31  
32 159 Tokyo, Japan). Subjective refraction was then assessed monocularly according to the  
33  
34 160 cycloplegic refraction values. The best-corrected VA (BCVA) was recorded based on  
35  
36 161 monocular subjective refraction, using the same protocol and VA chart as the UCVA  
37  
38 162 measurements.

### 37 163 **Definitions**

39 164 The criteria of refractive errors were based on the cycloplegic refraction values:  
40  
41 165 myopia was defined as  $SER \leq -0.50$  D in either eye; hyperopia was defined as  $SER \geq$   
42  
43 166  $+2.00$  D in either eye; astigmatism was defined as a cylindrical refractive error  $\geq 0.75$   
44  
45 167 D; anisometropia was defined as an SER difference  $\geq 2.00$  D interocularly.

46  
47 168 To be comparable with SKES, two definitions of amblyopia were adopted in the  
48  
49 169 present report. Amblyopia risk factors should be identified when diagnosing  
50  
51 170 amblyopia in each of the definitions: (1) the American Academy of Ophthalmology  
52  
53 171 (AAO) amblyopia Preferred Practice Pattern (PPP) guidelines define unilateral  
54  
55 172 amblyopia in preschoolers aged 36 to  $< 48$  months as an IOD of greater than or equal  
56  
57 173 to two lines of BCVA, and bilateral amblyopia as BCVA less than 20/50 in either

1  
2  
3 174 eye;<sup>15</sup> (2) the Chinese Ophthalmology Society (COS) guidelines define amblyopia in  
4  
5 175 preschoolers aged 36 to < 48 months as an IOD of greater than or equal to two lines  
6  
7 176 of BCVA or BCVA less than 20/40 in either eye.<sup>16</sup>  
8

9 **177 Inclusion and exclusion criteria**

10  
11 178 Only Chinese children aged 36 to < 48 months able to complete monocular  
12  
13 179 UCVA testing in both eyes and without neurological problems were included in the  
14  
15 180 analysis and considered as the general study population. The reference population was  
16  
17 181 defined as the children without sight-affecting ocular conditions, including myopia,  
18  
19 182 hyperopia, astigmatism, anisometropia, amblyopia, strabismus, nystagmus, visual axis  
20  
21 183 occlusion, or other anterior segment or fundus abnormalities capable of causing visual  
22  
23 184 impairment.

24 **185 Statistical analysis**

25  
26 186 UCVA outcomes were recorded continuously as mean logMAR UCVA or mean  
27  
28 187 logMAR IOD in UCVA and dichotomously as the proportion of children achieving a  
29  
30 188 particular level of UCVA or IOD. The UCVA for right and left eyes in the reference  
31  
32 189 population were highly correlated (Pearson's correlation = 0.721,  $p < 0.01$ ), thus right  
33  
34 190 eye UCVA was used to report the distribution of UCVA. The UCVA cutoff for referral  
35  
36 191 was defined as the lowest 5th percentile of the normative distribution of UCVA.  
37  
38 192 Effectiveness in referral for amblyopia or refractive error using the estimated UCVA  
39  
40 193 cutoff was then calculated. Multiple linear regression was used to assess associations  
41  
42 194 of logMAR UCVA with age, gender, and other potential risk factors. All analyses  
43  
44 195 were performed by using SPSS 22.0 (IBM, China) and a 0.05 significance level.  
45  
46  
47  
48  
49  
50  
51  
52  
53  
54  
55  
56  
57  
58  
59  
60



1  
2  
3 196 **RESULTS**

4  
5 197 **Study population**

6  
7 198 A total of 2,300 preschoolers were enrolled in this study, and 1,806 participated in  
8  
9 199 the UCVA test (78.5% responses rate), among which 1,606 (88.9%) were testable in  
10  
11 200 both eyes and considered as the general population. According to the definition  
12  
13 201 outlined in the methods, 791 (49.3%) children were classified as the reference  
14  
15 202 population. Boys constituted 53.5% of the reference population and 52.5% of the  
16  
17 203 general population. There was no statistically significant sex difference in the mean  
18  
19 204 age of the reference population ( $P = 0.277$ ) and the general population ( $P = 0.607$ ).

20  
21 205 **UCVA outcomes**

22  
23 206 Table 1 presents the distributions of UCVA in the reference population. About 60%  
24  
25 207 (478 out of 791) of the measured monocular UCVA fell in the category of 20/32. The  
26  
27 208 5th, 50th, and 95th percentiles fell in the UCVA categories of 20/40, 20/32, and 20/25,  
28  
29 209 respectively.

30  
31 210

32 **Table 1. Distribution of UCVA and IOD in the reference population**

|                                        | n (%)       |
|----------------------------------------|-------------|
| <b>LogMAR UCVA (Snellen equiv.)</b>    |             |
| 0.6 (20/80)                            | 1 (0.1)     |
| 0.5 (20/63)                            | 2 (0.3)     |
| 0.4 (20/50)                            | 6 (0.8)     |
| 0.3 (20/40)                            | 106 (13.4)* |
| 0.2 (20/32)                            | 478 (60.4)* |
| 0.1 (20/25)                            | 170 (21.5)* |
| 0 (20/20)                              | 27 (3.4)    |
| -0.1 (20/16)                           | 1 (0.1)     |
| <b>UCVA IOD, lines (LogMAR equiv.)</b> |             |
| 0 (0.0)                                | 595 (75.2)  |
| 1 (0.1)                                | 181 (22.9)  |

|         |          |
|---------|----------|
| 2 (0.2) | 14 (1.8) |
| 3 (0.3) | 1 (0.1)  |

\*The 5th, 50th, and 95th percentiles fell in the UCVA categories of 20/40, 20/32, and 20/25, respectively.

211

212 Age-specific and gender-specific mean logMAR UCVA levels for the right eye in  
 213 the reference population are shown in Table 2. A multivariate linear regression model  
 214 including age and gender showed that UCVA improved with increasing age ( $p <$   
 215  $0.0001$ ), but had no association with gender ( $p = 0.892$ ). Risk factors adjusted for age  
 216 and adjusted for age and gender for UCVA in the reference population are shown in  
 217 Table 3. Only prematurity was significantly associated with poorer UCVA after  
 218 adjustment for age ( $p = 0.040$ ), or adjusted for age and gender ( $p = 0.041$ ).

219

**Table 2. Mean logMAR UCVA and IOD in reference generation, by age and by gender**

|                      | <b>n</b> | <b>Mean UCVA (SD)</b> | <b>Mean absolute UCVA IOD (SD)</b> |
|----------------------|----------|-----------------------|------------------------------------|
| <b>All</b>           | 791      | 0.19 (0.07)           | 0.03 (0.05)                        |
| <b>Age in months</b> |          |                       |                                    |
| 36 to <42            | 438      | 0.19 (0.08)           | 0.03 (0.05)                        |
| 42 to <48            | 353      | 0.18 (0.07)           | 0.02 (0.04)                        |
| <b>Gender</b>        |          |                       |                                    |
| Male                 | 423      | 0.19 (0.08)           | 0.03 (0.05)                        |
| Female               | 368      | 0.19 (0.07)           | 0.02 (0.05)                        |

220 75.2% (595 out of 791) children in the reference population achieved equal vision  
 221 in both eyes and only 1.9% had an IOD of two or more lines ( $\geq 0.2$  logMAR) (Table  
 222 1). Table 2 shows mean absolute logMAR UCVA IOD in the reference population, by  
 223 age and by gender. A multivariate linear regression model including age and gender  
 224 showed that absolute UCVA IOD decreased with increasing age ( $p = 0.014$ ), but had  
 225 no association with gender ( $p = 0.227$ ).  
 226 The mean non-absolute logMAR UCVA IOD (right eye minus left eye logMAR

**Table 3. Risk factors adjusted for age and adjusted for age and gender for UCVA in the reference population**

| Associated factors                                  | Adjusted for age | Adjusted for age and gender |       |              |
|-----------------------------------------------------|------------------|-----------------------------|-------|--------------|
|                                                     | p value          | $\beta$ coefficient         | $r^2$ | p value      |
| Prematurity <37 weeks                               | <b>0.040</b>     | 0.082                       | 0.032 | <b>0.041</b> |
| Low birth weight <2500 g                            | 0.163            | 0.054                       | 0.028 | 0.163        |
| Maternal smoking during pregnancy                   | 0.770            | 0.012                       | 0.023 | 0.758        |
| Maternal drinking during pregnancy                  | 0.264            | -0.042                      | 0.024 | 0.270        |
| Parental tertiary education (University or College) | 0.755            | -0.012                      | 0.024 | 0.754        |
| Monthly family income                               | 0.685            | -0.019                      | 0.016 | 0.689        |
| Employment of one parent                            | 0.501            | -0.028                      | 0.030 | 0.506        |
| Employment of both parents                          | 0.791            | 0.011                       | 0.029 | 0.798        |

227 VA) in the reference population was 0.0023, with no significantly difference from  
 228 zero ( $p = 0.251$ ), indicating no influence of the order in which the eyes were tested on  
 229 UCVA.

### 230 Effectiveness of the UCVA and UCVA IOD referral cutoffs

231 Using the 5th percentile UCVA cutoff from the reference population (defined as  
 232 UCVA  $\leq 20/40$ ) would generate referral rates of 26.9% (432 cases) in the general  
 233 population. Table 4 shows the effectiveness in terms of sensitivity, specificity, positive  
 234 predictive value (PPV) and negative predictive value (NPV) in referral for refractive

235 errors or amblyopia using the current UCVA cutoff. A total of 39.5% (301/762) of  
 236 cases with any refractive error were detected, with a specificity of 84.5% (713/844).  
 237 For amblyopia using the AAO definition, the sensitivity and specificity were 86.2%  
 238 (25/29) and 74.2% (1170/1577), respectively, which are similar to the findings when  
 239 using the COS amblyopia definition (86.7% and 74.2%).  
 240

**Table 4. Effectiveness in Referral for Refractive Errors or Amblyopia Using the lowest 5th Percentile UCVA**

**Cutoff Criteria**

|                          | Sensitivity, n/N (%) | Specificity, n/N (%) | PPV, n/N (%)   | NPV, n/N (%)     |
|--------------------------|----------------------|----------------------|----------------|------------------|
| <b>Refractive Errors</b> |                      |                      |                |                  |
| Myopia                   | 112/319 (35.1)       | 967/1287 (75.1)      | 112/432 (25.9) | 967/1174 (82.4)  |
| Hyperopia                | 43/84 (51.2)         | 1133/1522 (74.4)     | 43/432 (10.0)  | 1133/1174 (96.5) |
| Astigmatism              | 252/518 (48.6)       | 908/1088 (83.5)      | 252/432 (58.3) | 908/1174 (77.3)  |
| Anisometropia            | 26/59 (44.1)         | 1141/1547 (73.8)     | 26/432 (6.0)   | 1141/1174 (97.2) |
| All                      | 301/762 (39.5)       | 713/844 (84.5)       | 301/432 (69.7) | 713/1174 (60.73) |
| <b>Amblyopia</b>         |                      |                      |                |                  |
| AAO Definition           |                      |                      |                |                  |
| Unilateral Amblyopia     | 11/14 (78.6)         | 1171/1601 (73.1)     | 11/432 (2.5)   | 1171/1174 (99.7) |
| Bilateral Amblyopia      | 14/15 (93.3)         | 1173/1591 (73.7)     | 14/432 (3.2)   | 1173/1174 (99.9) |
| All                      | 25/29 (86.2)         | 1170/1577 (74.2)     | 25/432 (5.8)   | 1170/1174 (99.7) |
| COS Definition           |                      |                      |                |                  |
|                          | 26/30 (86.7)         | 1170/1576 (74.2)     | 26/432 (6.0)   | 1170/1174 (99.7) |

241

242 When using the UCVA IOD of two or more lines as the criterion, only 4.3% (69  
 243 cases) of the general population would be referred. According to the AAO definition,  
 244 this criterion detected 20.7% (6/29) of cases with any amblyopia, and 28.6% (4/14) of  
 245 cases with unilateral amblyopia. For amblyopia using the COS definition, 26.7%  
 246 (8/30) of cases with amblyopia were detected using such criterion.

1  
2  
3  
4  
5  
6  
7  
8  
9  
10  
11  
12  
13  
14  
15  
16  
17  
18  
19  
20  
21  
22  
23  
24  
25  
26  
27  
28  
29  
30  
31  
32  
33  
34  
35  
36  
37  
38  
39  
40  
41  
42  
43  
44  
45  
46  
47  
48  
49  
50  
51  
52  
53  
54  
55  
56  
57  
58  
59  
60

## 247 DISCUSSION

248 In China, SKES was the only population-based investigation of UCVA normative  
249 distribution in Chinese preschoolers before our study.<sup>10</sup> In order to be comparable  
250 with SKES and also to ensure that children with sight-affecting ocular conditions  
251 were excluded, we used the same stringent definition of the “reference population” as  
252 SKES. However, the lowest 5th percentile in our reference population, falling in the  
253 UCVA category of 20/40, was two lines better than this found in the 36-month-old  
254 reference population in SKES (20/63). In addition, the 50th percentile in our reference  
255 population was one line better than this in SKES (20/32 vs. 20/40). Two reasons  
256 might contribute to the differences between our study and SKES. First, we measured  
257 the UCVA using the HOTV chart, which is recommended and commonly used in  
258 Western countries for young children,<sup>6-7, 12</sup> while SKES used the ETDRS Tumbling E  
259 chart which is harder cognitively for the child to understand and thus affect the  
260 threshold acuity that can be achieved by the child.<sup>17-19</sup> Second, smaller sample size of  
261 the 36-month-old children (51 cases) in the reference population of SKES might have  
262 a significant influence on the results of UCVA normative distribution.

263 We are unable to compare the mean logMAR UCVA in our study with that in  
264 SKES as SKES didn't calculate this. When our mean logMAR UCVA is compared to  
265 this obtained from the African American and Hispanic children without sight-affecting  
266 abnormalities in MEPEDS, the mean logMAR UCVA in our reference population is  
267 very close to this established in the MEPEDS 36- to 47-month-old children using the  
268 ATS HOTV (0.19 vs. 0.17 logMAR, respectively).<sup>6</sup> If compared to the results  
269 obtained from the European Caucasian and Asian children without sight-affecting  
270 abnormalities in SPEDS, the mean logMAR UCVA in our reference population is  
271 close to one line worse than this tested with the ATS HOTV in SPEDS (0.19 vs. 0.09  
272 logMAR for children aged 36 to <42 months; 0.18 vs. 0.07 for 42 to <48 months), and  
273 similar to this tested with the linear ETDRS or HOTV logMAR chart (0.19 vs. 0.22  
274 logMAR for children aged 36 to <42 months; 0.18 vs. 0.16 for 42 to <48 months).<sup>7</sup>  
275 However, the significances of such comparisons are not very clear, because the ATS

1  
2  
3 276 HOTV VA test, which uses a single letter surrounded by bars optimally placed at half  
4  
5 277 the optotype height from the letter optotype, is quite different from the linear HOTV  
6  
7 278 logMAR chart that we used, and SPEDS didn't specify the mean logMAR UCVA  
8  
9 279 when only using linear HOTV logMAR chart. The better VA by approximately 1 line  
10  
11 280 (using the ATS HOTV test) found in SPEDS when compared to our study might be  
12  
13 281 due to the following reasons: (1) Non-cycloplegic refraction was performed on part of  
14  
15 282 children in our reference population, which may underdiagnose hyperopia due to  
16  
17 283 accommodative reserves<sup>20-21</sup> and then produce slightly reduced VA in the reference  
18  
19 284 population due to hyperopia; (2) The ATS HOTV is cognitively easier to perform by  
20  
21 285 preschoolers than the linear chart;<sup>22</sup> (3) Leone et al found that East Asian children had  
22  
23 286 significantly poorer VA than their European Caucasian counterparts,<sup>7</sup> which indicated  
24  
25 287 that ethnicity differences might have impacted our findings.

26  
27 288 We found improvement in UCVA with increasing age, as has been reported in  
28  
29 289 several studies despite different charts used.<sup>6-7, 10, 18, 23</sup> However, the difference  
30  
31 290 between UCVA in the 36- to <42-month-old children was only 0.01 logMAR worse  
32  
33 291 than the 42- to <48-month-old children (Table 2), which might have no clinical  
34  
35 292 significance. Gender was not associated with UCVA both in our sample and SPEDS,  
36  
37 293 opposite to that reported in MEPEDS.<sup>6-7</sup> As for risk factors of UCVA, prematurity was  
38  
39 294 related with worse UCVA in our reference population, which was consistent with the  
40  
41 295 finding in SPEDS. However, the  $r^2$  value was only 0.032, indicating that the  
42  
43 296 significance of prematurity to UCVA might not be very high. Socio economic status  
44  
45 297 (SES) factors, such as the employment status of parents and family income, which  
46  
47 298 were significantly associated with UCVA in MEPEDS and SPEDS, showed no  
48  
49 299 associations with UCVA in our study. In addition, maternal smoking during pregnancy,  
50  
51 300 which was related with slightly better UCVA in SPEDS, had no relationship with  
52  
53 301 UCVA in our study.

54  
55 302 As the penalty for missing one amblyopia case is a lifetime disability and  
56  
57 303 treatment exists, the UCVA referral cutoff for amblyopia should target high sensitivity,  
58  
59 304 while the specificity should be high enough not to put immense load on  
60

1  
2  
3 305 ophthalmologists.<sup>24-25</sup> The sensitivity of detecting amblyopia by using the UCVA  
4  
5 306 referral cutoff in our study ( $UCVA \leq 20/40$  at age 36 to < 48 months), was as high as  
6  
7 307 86%, and at the same time, the specificity was high enough (74.2%). On the other  
8  
9 308 hand, this cutoff only identified a total of 39.5% refractive errors, even though the  
10  
11 309 overall specificity was high (84.5%). The sensitivity in detecting myopia was not  
12  
13 310 good in our study (35.1%), lower than hyperopia (51.2), astigmatism (48.6%), and  
14  
15 311 anisometropia (44.1%). In SKES, even though a high sensitivity (83.3%) in detecting  
16  
17 312 myopia was observed in all 36- to 72-month-old preschoolers, it's not available to  
18  
19 313 calculate the sensitivity in detecting myopia in 36-month-old children because of no  
20  
21 314 presence of myopia in this age group. And for all refractive errors in 36-month-old  
22  
23 315 children in SKES, the overall sensitivity was only 8.6%. Therefore, only using the  
24  
25 316 UCVA cutoff as referral criterion might be difficult to detect refractive errors in  
26  
27 317 36-month-old children, and additional refraction examination might be necessary for  
28  
29 318 vision screening.

30  
31 319 The normative distribution of UCVA IOD in our study was consistent with that in  
32  
33 320 SKES, with most children achieving equal vision in both eyes. No effect of gender or  
34  
35 321 testing order on IOD was observed in our study, which was consistent with MEPEDS.  
36  
37 322 However, we found that absolute UCVA IOD decreased with increasing age of month  
38  
39 323 in our sample, which was not consistent with the findings in 30- to 72-month-old  
40  
41 324 children in MEPEDS. The reason of this difference might be that, in MEPEDS, equal  
42  
43 325 vision in both eyes in older children concealed the effect of age on UCVA IOD in  
44  
45 326 younger children.

46  
47 327 When using UCVA IOD of two or more lines as the criterion, approximately 4%  
48  
49 328 in the general population would be referred in both of SKES and our study. The  
50  
51 329 sensitivity of using this criterion alone for detecting amblyopia, including unilateral  
52  
53 330 amblyopia, was very low in our study, similar to the results in SKES.

54  
55 331 To our knowledge, the present study is the first to provide population-based  
56  
57 332 HOTV-specific normative UCVA data in Chinese preschoolers aged 36 to < 48  
58  
59 333 months without significant refractive error or other ophthalmic abnormalities.  
60

1  
2  
3 334 However, there are several limitations in the present study. Because young children  
4  
5 335 are very afraid of using eye drops, which makes cycloplegia difficult and  
6  
7 336 unacceptable for parents, only children with suspected abnormalities underwent  
8  
9 337 cycloplegic refraction in our study. Even though not all children had refraction  
10  
11 338 results under cycloplegia, we adopted stringent criteria to identify children who  
12  
13 339 needed cycloplegic refraction, which could effectively detect sight-affecting refractive  
14  
15 340 errors. However, Fotedar et al<sup>20</sup> and Leone et al<sup>21</sup> found that hyperopia and some  
16  
17 341 astigmatism might not be as detectable without cycloplegia, which might impact the  
18  
19 342 findings of our reference population at some degree. 11.1% children were not testable  
20  
21 343 when doing the HOTV test and were excluded from the analysis, which may influence  
22  
23 344 the normative UCVA distribution. However, the testability in our study was at an  
24  
25 345 average level of published reports,<sup>6, 10</sup> which tested VA using the HOTV single  
26  
27 346 surrounded letters, not linear, and difficult to increase further in young children.

28 347 In conclusion, our study suggests that Chinese preschoolers aged 36 to < 48  
29  
30 348 months with UCVA no better than 20/40 measured by linear HOTV chart should be  
31  
32 349 referred for further ophthalmic examinations. Most amblyopia cases can be identified  
33  
34 350 with this age-specific and chart-specific UCVA cutoff.



1  
2  
3  
4 351 **Acknowledgements** We thank the children, the corresponding parents or legal  
5  
6 352 guardians and all the members of the Maternal and Child Healthcare Hospital of  
7  
8 353 Yuhuatai District, Nanjing, China, for helpful advice and support.

9 354 **Contributors** Conceived and designed the experiments: HL, HZ, DH and QS.  
10  
11 355 Performed the experiments: HZ, DH, QS, HD, JB, JC, YW, XZ, JW and XL.  
12  
13 356 Analyzed the data: HZ, DH, QS and XC. Contributed reagents/materials/analysis  
14  
15 357 tools: HL, HZ, DH, HD, JB, JC, and XC. Wrote the paper: HL, HZ, DH, QS, XC, HD,  
16  
17 358 JB, JC, YW, XZ, JW and XL.

18 359 **Funding** This study is supported by Scientific Research Projects of Jiangsu Provincial  
19  
20 360 Commission of Health and Family Planning (Grant No. H201507); Natural Science  
21  
22 361 Foundation of Jiangsu Province (Grant No. BK20141027 and No. BK20161595);  
23  
24 362 National Natural Science Foundation of China (Grant No. 81400435 and No.  
25  
26 363 81673198).

27  
28 364 **Competing interests** None declared.

29  
30 365 **Patient consent** Obtained.

31  
32 366 **Ethics approval** The Institutional Review Board of Jiangsu Province Hospital.

33  
34 367 **Provenance and peer review** Not commissioned; externally peer reviewed.

35  
36 368 **Data sharing statement** No additional data are available.  
37  
38  
39  
40  
41  
42  
43  
44  
45  
46  
47  
48  
49  
50  
51  
52  
53  
54  
55  
56  
57  
58  
59  
60

369 **REFERENCE**

- 370 1 Hartmann EE, Dobson V, Hainline L, et al. Preschool vision screening: summary  
371 of a Task Force report. Behalf of the Maternal and Child Health Bureau and the  
372 National Eye Institute Task Force on Vision Screening in the Preschool Child.  
373 *Pediatrics* 2000;106:1105-16.
- 374 2 American Academy of Pediatrics, Committee on Practice and Ambulatory  
375 Medicine and Section on Ophthalmology. Eye examination in infants, children,  
376 and young adults by pediatricians. *Pediatrics* 2003;111:902-7.
- 377 3 Lai YH, Hsu HT, Wang HZ, et al. The visual status of children ages 3 to 6 years  
378 in the vision screening program in Taiwan. *J AAPOS* 2009;13:58-62.
- 379 4 Hard AL, Sjodell L, Borres MP, et al. Preschool vision screening in a Swedish  
380 city region: results after alteration of criteria for referral to eye clinics. *Acta*  
381 *Ophthalmol Scand* 2002;80:608-11.
- 382 5 Donahue SP, Arthur B, Neely DE, et al. Guidelines for automated preschool  
383 vision screening: a 10-year, evidence-based update. *J AAPOS* 2013;17:4-8.
- 384 6 Pan Y, Tarczy-Hornoch KT, Cotter SA, et al. Visual acuity norms in pre-school  
385 children: the Multi-Ethnic Pediatric Eye Disease Study. *Optom Vis Sci*  
386 2009;86:607-12.
- 387 7 Leone JF, Mitchell P, Kifley A, et al. Normative visual acuity in infants and  
388 preschool-aged children in Sydney. *Acta Ophthalmol* 2014;92:e521-e529.
- 389 8 Friedman DS, Repka MX, Katz J, et al. Prevalence of decreased visual acuity  
390 among preschool-aged children in an American urban population: the Baltimore  
391 Pediatric Eye Disease Study, methods, and results. *Ophthalmology*  
392 2008;115:1786-95.
- 393 9 Robaei D, Rose K, Ojaimi E, et al. Visual acuity and the causes of visual loss in a  
394 population-based sample of 6-year-old Australian children. *Ophthalmology*  
395 2005;112:1275-82.
- 396 10 Guo X, Fu M, Lu J, et al. Normative distribution of visual acuity in 3- to  
397 6-year-old Chinese preschoolers: the Shenzhen Kindergarten Eye Study. *Invest*

- 1  
2  
3 398 Ophthalmol Vis Sci 2015;56:1985-92.  
4  
5 399 11 Cryotherapy for Retinopathy of Prematurity Cooperative Group. Multicenter trial  
6  
7 400 of cryotherapy for retinopathy of prematurity: Snellen visual acuity and structural  
8  
9 401 outcome at 5 1/2 years after randomization. Arch Ophthalmol 1996;114:417-24.  
10  
11 402 12 Hartmann EE, Bradford GE, Chaplin PK, et al. Project Universal Preschool  
12  
13 403 Vision Screening: a demonstration project. Pediatrics 2006;117(2):e226-37.  
14  
15 404 13 Huang D, Chen X, Gong Q, et al. Ocular biometric parameters among 3-year-old  
16  
17 405 Chinese children: testability, distribution and association with anthropometric  
18  
19 406 parameters. Sci Rep 2016 Jul 7;6:29577. doi: 10.1038/srep29577.  
20  
21 407 14 Holmes JM, Beck RW, Repka MX, et al. The amblyopia treatment study visual  
22  
23 408 acuity testing protocol. Arch Ophthalmol 2001;119:1345-53.  
24  
25 409 15 American Academy of Ophthalmology Pediatric Ophthalmology/Strabismus  
26  
27 410 Panel. Preferred practice pattern® Guidelines. Amblyopia. San Francisco, CA:  
28  
29 411 American Academy of Ophthalmology;2012. Available at: www.aao.org/ppp.  
30  
31 412 16 Chinese Ophthalmology Society. Guidelines for amblyopia diagnosis. Chin J  
32  
33 413 Ophthalmol 2011;47:768.  
34  
35 414 17 He M, Zeng J, Liu Y, et al. Refractive error and visual impairment in urban  
36  
37 415 children in southern China. Ophthalmology 2004;45:795-9.  
38  
39 416 18 Drover JR, Feliuss J, Cheng CS, et al. Normative pediatric visual acuity using  
40  
41 417 single surrounded HOTV optotypes on the Electronic Visual Acuity Tester  
42  
43 418 following the Amblyopia Treatment Study protocol. J AAPOS 2008;12:145-9.  
44  
45 419 19 Rice ML, Leske DA, Holmes JM. Comparison of the amblyopia treatment study  
46  
47 420 HOTV and electronic-early treatment of diabetic retinopathy study visual acuity  
48  
49 421 protocols in children aged 5 to 12 years. Am J Ophthalmol 2004;137:278-82.  
50  
51 422 20 Fotedar R, Rochtchina E, Morgan I, et al. Necessity of cycloplegia for assessing  
52  
53 423 refractive error in 12-year-old children: a population-based study. Am J  
54  
55 424 Ophthalmol 2007; 144(2): 307-9.  
56  
57 425 21 Leone JF, Mitchell P, Morgan IG, et al. Use of visual acuity to screen for  
58  
59 426 significant refractive errors in adolescents: is it reliable? Arch Ophthalmol 2010;

- 1  
2  
3 427 128(7): 894-9.  
4  
5 428 22 Leone JF, Gole GA, Mitchell P, et al. Visual acuity testability and comparability  
6  
7 429 in Australian preschool children: The Sydney Paediatric Eye Disease Study. Eye  
8  
9 430 (London, England) 2012; 26(7): 925-32.  
10  
11 431 23 Dobson V, Clifford D, Candice E, et al. Normative monocular visual acuity for  
12  
13 432 early treatment diabetic retinopathy study charts in emmetropic children 5 to 12  
14  
15 433 years of age. Ophthalmology 2009;116:1397-401.  
16  
17 434 24 Kvarnström G, Jakobsson P, Lennerstrand G. Screening for visual and ocular  
18  
19 435 disorders in children, evaluation of the system in Sweden. Acta Paediatr  
20  
21 436 1998;87:1173-9.  
22  
23 437 25 Mladen Bušić, Mirjana Bjeloš, Mladen Petrovečki, et al. Zagreb Amblyopia  
24  
25 438 Preschool Screening Study: near and distance visual acuity testing increase the  
26  
27 439 diagnostic accuracy of screening for amblyopia. Croat Med J 2016;57:29-41.  
28  
29  
30  
31  
32  
33  
34  
35  
36  
37  
38  
39  
40  
41  
42  
43  
44  
45  
46  
47  
48  
49  
50  
51  
52  
53  
54  
55  
56  
57  
58  
59  
60
